# Supplementary material for: 角膜移植の対象疾患と術式の変遷 (特集 第63回日本臨床眼科学会講演集(8))
Source: HighWire-hosted journal article supplement (doi:10.1136/oemed-2022-108457), 2010-10-01
Supplement: oemed-2022-108457supp003_data_supplement.pdf [file oemed-2022-108457supp003_data_supplement.pdf]

**Supplemental Table 1. Interactions effects for Outcomes with repeated temperature measurements.<sup>+</sup> N= 30 surgeons, 120 surgeries**

| Outcome                            | N    | 3-way interaction | 2-way interactions |          |             |
|------------------------------------|------|-------------------|--------------------|----------|-------------|
|                                    |      | Trt*period* time  | Trt*period         | Trt*time | Period*time |
| Primary analyses                   |      |                   |                    |          |             |
| Mean skin temperature              | 1060 | >0.99             | 0.006              | 0.006    | 0.88        |
| Core body temperature <sup>§</sup> | 1047 | >0.99             | <0.001             | >0.99    | >0.99       |
| Sensitivity analysis **            |      |                   |                    |          |             |
| Mean skin temperature              | 1004 | >0.99             | 0.007              | 0.049    | 0.85        |
| Core body temperature <sup>§</sup> | 991  | >0.99             | <0.001             | 0.99     | 0.99        |

Mean skin temperature and Core body temperature are repeatedly measured every 15 minutes during surgery.

<sup>§</sup> n = 1 surgery was not included as the thermometer was malfunctioning.

<sup>+</sup> P-values for interaction terms were calculated from a repeated measures linear model with a compound symmetry structure.

\*\* Data were truncated after 13<sup>th</sup> measurements in each surgery.
