# Supplementary material for: 角膜移植の対象疾患と術式の変遷 (特集 第63回日本臨床眼科学会講演集(8))
Source: HighWire-hosted journal article supplement (doi:10.1136/oemed-2022-108457), 2010-10-01
Supplement: oemed-2022-108457supp004_data_supplement.pdf [file oemed-2022-108457supp004_data_supplement.pdf]

**Supplemental Table 2. Treatment effect overall and within each period on secondary temperature outcomes**

| <b>Outcome</b>                           | <b>Estimated Treatment effect*<br/>[vest minus no vest] (95% CI)</b> | <b>P-value</b>   |
|------------------------------------------|----------------------------------------------------------------------|------------------|
| <b>A. Primary analyses</b>               |                                                                      |                  |
| <b>Mean skin temperature</b>             |                                                                      |                  |
| <b>Overall</b>                           | <b>-0.19 (-0.25, -0.13)</b>                                          | <b>&lt;0.001</b> |
| Treatment x Period Interaction           |                                                                      | <b>&lt;0.001</b> |
| Period 1                                 | -0.02 (-0.17, 0.14)                                                  | 0.815            |
| Period 2                                 | -0.30 (-0.46, -0.14)                                                 | <0.001           |
| Period 3                                 | -0.41 (-0.57, -0.25)                                                 | <0.001           |
| Period 4                                 | -0.05 (-0.20, 0.11)                                                  | 0.554            |
| <b>Core body temperature<sup>§</sup></b> |                                                                      |                  |
| <b>Overall</b>                           | <b>-0.14 (-0.20, -0.08)</b>                                          | <b>&lt;0.001</b> |
| Trt* period Interaction                  |                                                                      | <b>&lt;0.001</b> |
| Period 1                                 | -0.18 (-0.32, -0.02)                                                 | 0.022            |
| Period 2                                 | 0.14 (-0.01, 0.29)                                                   | 0.076            |
| Period 3                                 | -0.30 (-0.45, -0.15)                                                 | <0.001           |
| Period 4                                 | -0.21 (-0.36, -0.06)                                                 | 0.005            |
| <b>B. Sensitivity analyses**</b>         |                                                                      |                  |
| <b>Mean skin temperature</b>             |                                                                      |                  |
| <b>Overall</b>                           | <b>-0.21 (-0.28, -0.15)</b>                                          | <b>&lt;0.001</b> |
| Trt* period Interaction                  |                                                                      | <b>&lt;0.001</b> |
| Period 1                                 | -0.06 (-0.22, 0.09)                                                  | 0.440            |
| Period 2                                 | -0.32 (-0.48, -0.16)                                                 | <0.001           |
| Period 3                                 | -0.43 (-0.59, -0.26)                                                 | <0.001           |
| Period 4                                 | -0.06 (-0.22, 0.09)                                                  | 0.439            |
| <b>Core body temperature<sup>§</sup></b> |                                                                      |                  |
| <b>Overall</b>                           | <b>-0.14 (-0.20, -0.08)</b>                                          | <b>&lt;0.001</b> |
| Trt* period Interaction                  |                                                                      | <b>&lt;0.001</b> |
| Period 1                                 | -0.18 (-0.33, -0.03)                                                 | 0.023            |
| Period 2                                 | 0.14 (-0.02, 0.29)                                                   | 0.081            |
| Period 3                                 | -0.29 (-0.45, -0.14)                                                 | <0.001           |
| Period 4                                 | -0.22 (-0.37, -0.06)                                                 | 0.005            |

Mean skin temperature and core body temperature were repeatedly measured every 15 minutes during surgery.

<sup>§</sup> n = 1 surgery was not included as the thermometer was malfunctioning.

\*Difference in Means treatment effect (95% CI) for Vest vs. No Vest estimated from a repeated measures linear model with a compound symmetry correlation structure. Overall is main effect model collapsing over period and others are treatment effect within each period.

\*\* Data are being truncated after 13th measurements in each surgery.
