# Supplementary figures and images for: 角膜移植の対象疾患と術式の変遷 (特集 第63回日本臨床眼科学会講演集(8))
Source: HighWire-hosted journal article supplement (doi:10.1136/oemed-2022-108457), 2010-10-01

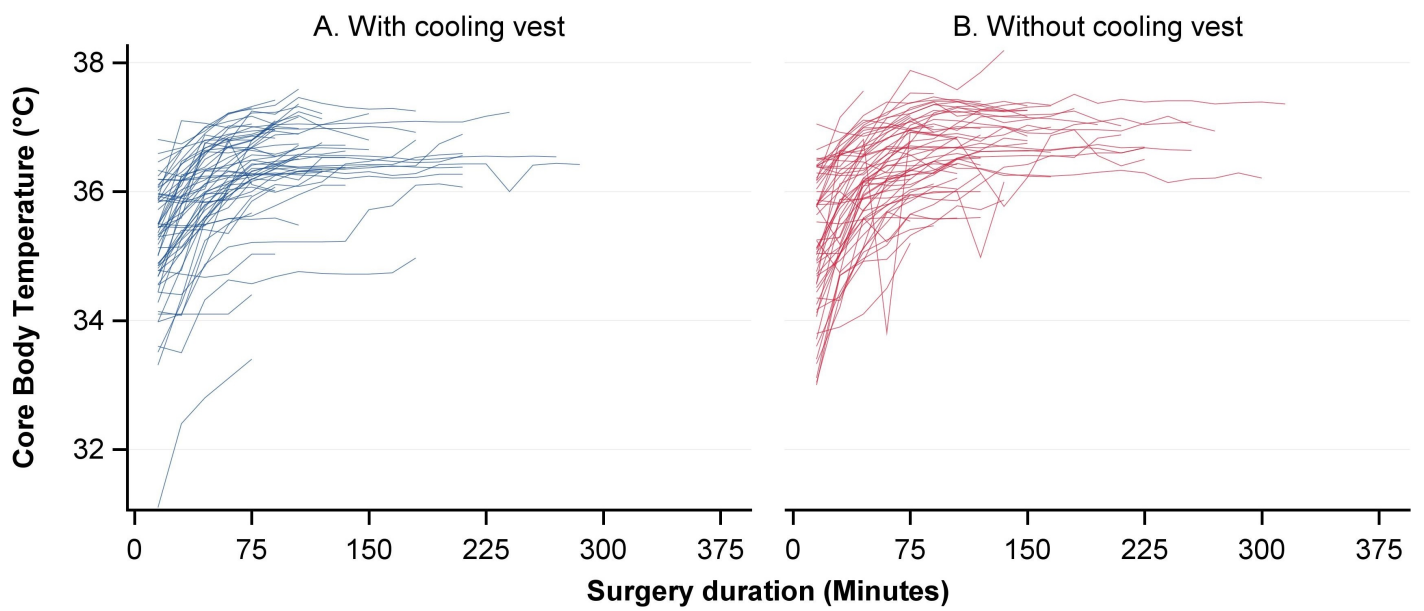

Supplement: oemed-2022-108457supp001_data_supplement.pdf [file oemed-2022-108457supp001_data_supplement.pdf]

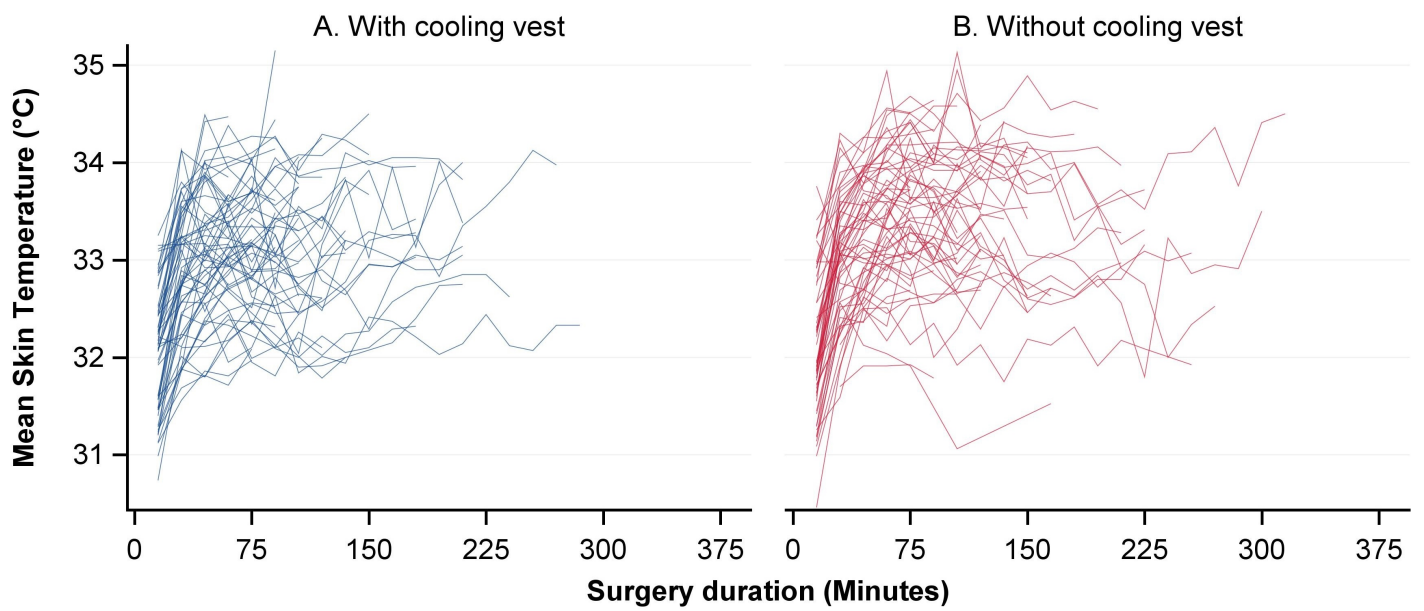

Supplement: oemed-2022-108457supp002_data_supplement.pdf [file oemed-2022-108457supp002_data_supplement.pdf]
